# Supplementary material for: Facile synthesis of defective ZnS–ZnO composite nanosheets for efficient piezocatalytic H2 production
Source: Royal Society of Chemistry journal article supplement (doi:10.1039/d4nr03733b), 2024-01-01
Supplement: d4nr03733b1.pdf [file d4nr03733b1.pdf]

## Supporting Information

### Facile synthesis of defective ZnS-ZnO composite nanosheets for efficient piezocatalytic H<sub>2</sub> production

Xiaoxiao Lu,<sup>a</sup> Xiaojing Zhao,<sup>a</sup> Xiangyu Chen,<sup>a</sup> Miaoqiong Xu,<sup>a</sup> Miaoling Huang,<sup>a</sup>  
Wen-Jie Chen,<sup>a</sup> Yubin Liu,<sup>a\*</sup> and Xiaoyang Pan<sup>a\*</sup>

<sup>a</sup> College of Chemical Engineering and Materials, Quanzhou Normal University,  
Quanzhou, 362000, China.

---

## Experimental Section.

### DFT calculation:

Density functional theory (DFT) calculations were performed using DMol3 and GGA-PW91. Convergence tolerance (quality: coarse; energy:  $1.0 \times 10^{-4}$  Ha; maximum force 0.02 Ha/Å; maximum displacement: 0.05 Å; maximum step size: 0.3 Å). A vacuum gap was set to approximately 50 Å. The calculated perfect (0 0 2) slab model and (4 × 4) supercells consisting of four-fold unit monolayers in the hexagonal P63mc space group. The characteristics of H<sub>2</sub>O adsorbed on (0 0 2) surfaces and the presence of S vacancy on (0 0 2) surfaces were investigated. The adsorption energy was calculated with:  $E_{ad} = E_{H_2O/slab} - E_{slab} - E_{H_2O}$ .  $E_{slab+H_2O}$  is the total energy of H<sub>2</sub>O adsorbed on (0 0 2) surface,  $E_{slab}$  denotes the total energy of surface.  $E_{H_2O}$  is the energy of an isolated H<sub>2</sub>O. According the present definition, a higher value of  $E_{ad}$  means stronger energy of absorption.

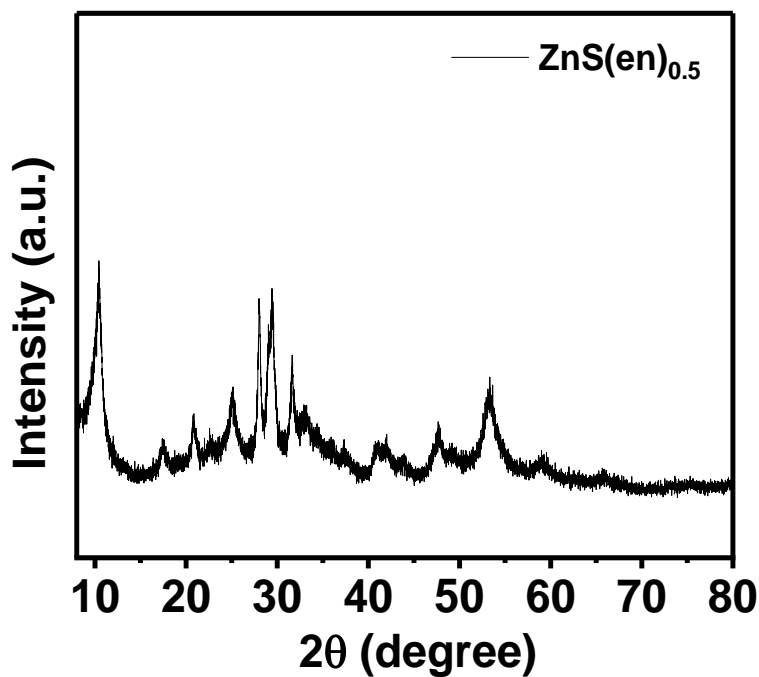

Fig. S1 The XRD patterns of the ZnS(en)<sub>0.5</sub>.

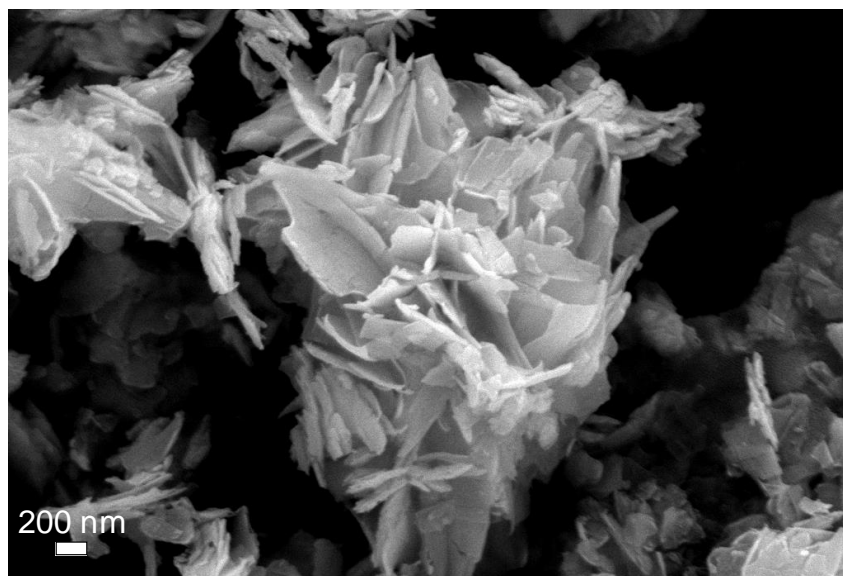

**Fig. S2** SEM image of the  $\text{ZnS(en)}_{0.5}$ .

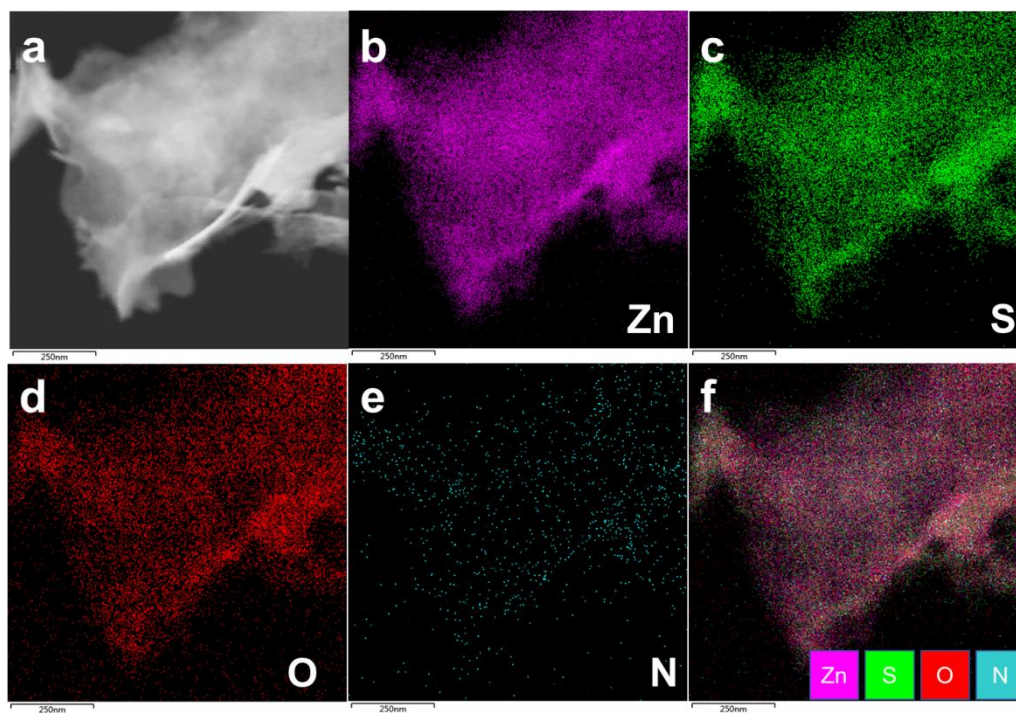

**Fig. S3** (a) HAADF-STEM image of ZnS-ZnO; (b-f) Elemental mapping images of ZnS-ZnO.

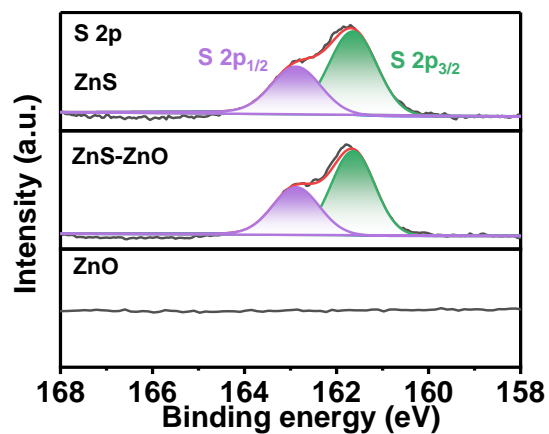

**Fig. S4** XPS spectra (S 2p) of the ZnS, ZnS-ZnO and ZnO.

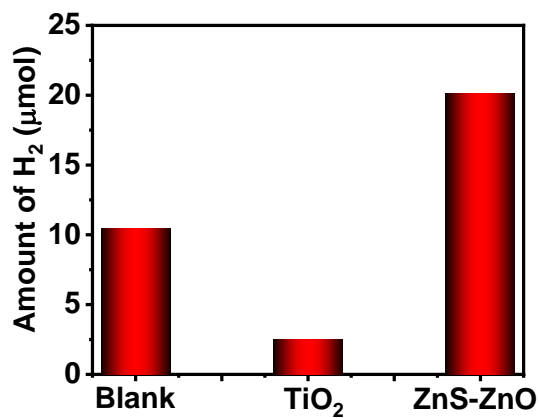

**Fig. S5.** (b) Average H<sub>2</sub> production in one hour over the samples (300 W, 45kHz, 10vol% CH<sub>3</sub>OH).

**Note:** The blank sample is performed without catalyst. TiO<sub>2</sub> is prepared according to our previous report.<sup>1</sup>

**Table S1.** Catalytic application for H<sub>2</sub> production driven by Ultrasonic vibration and corresponding experimental parameters.

| NO | Sample                                                 | Sample Dosage                                       | Energy Source            | H <sub>2</sub> evolution rates (mmol g <sup>-1</sup> h <sup>-1</sup> ) | Refererence |
|----|--------------------------------------------------------|-----------------------------------------------------|--------------------------|------------------------------------------------------------------------|-------------|
| 1  | ZnS-ZnO                                                | 5mg cat<br>10vol% MeOH                              | 45 kHz, 300 W            | 4.65                                                                   | This work   |
| 2  | Zn-N-C dipoles                                         | 20 mg cat<br>7vol% MeOH                             | 2500 r min <sup>-1</sup> | 0.0146                                                                 | 2           |
| 3  | (Bi <sub>0.5</sub> Na <sub>0.5</sub> )TiO <sub>3</sub> | 30mg cat<br>10vol% MeOH                             | 40 kHz                   | 2                                                                      | 3           |
| 4  | Ti <sub>3</sub> C <sub>2</sub> /SAMs-NH <sub>2</sub>   | 10 mg cat<br>0.05 M Na <sub>2</sub> SO <sub>3</sub> | 45 kHz, 600 W            | 0.184                                                                  | 4           |
| 5  | MoS <sub>2</sub>                                       | 20 mg cat<br>0.01M FeSO <sub>4</sub>                | 40 kHz, 110 W            | 0.029                                                                  | 5           |
| 6  | WSe <sub>2</sub>                                       | 20 mg cat<br>0.01M FeSO <sub>4</sub>                | 40 kHz, 110 W            | 0.011                                                                  | 5           |
| 7  | 0.7BiFeO <sub>3</sub> -0.3BaTiO <sub>3</sub>           | 30mg cat<br>MeOH                                    | 40 kHz, 100 W            | 1.322                                                                  | 6           |
| 8  | ZnSnO <sub>3</sub> nanowire                            | 10mg cat<br>50vol% ethanol                          | 40 kHz, 250 W            | 3.45                                                                   | 7           |
| 9  | OH-SrTiO <sub>3</sub>                                  | 50 mg cat<br>20vol% MeOH                            | 40 kHz, 300 W            | 0.43                                                                   | 8           |
| 10 | BiFeO <sub>3</sub>                                     | 10 mg cat<br>0.05M Na <sub>2</sub> SO <sub>3</sub>  | 40 kHz, 100 W            | 0.114                                                                  | 9           |
| 11 | BaTiO <sub>3</sub> nanosheet                           | 10mg cat<br>15vol% triethanolamine                  | 40 kHz, 100 W            | 0.092                                                                  | 10          |

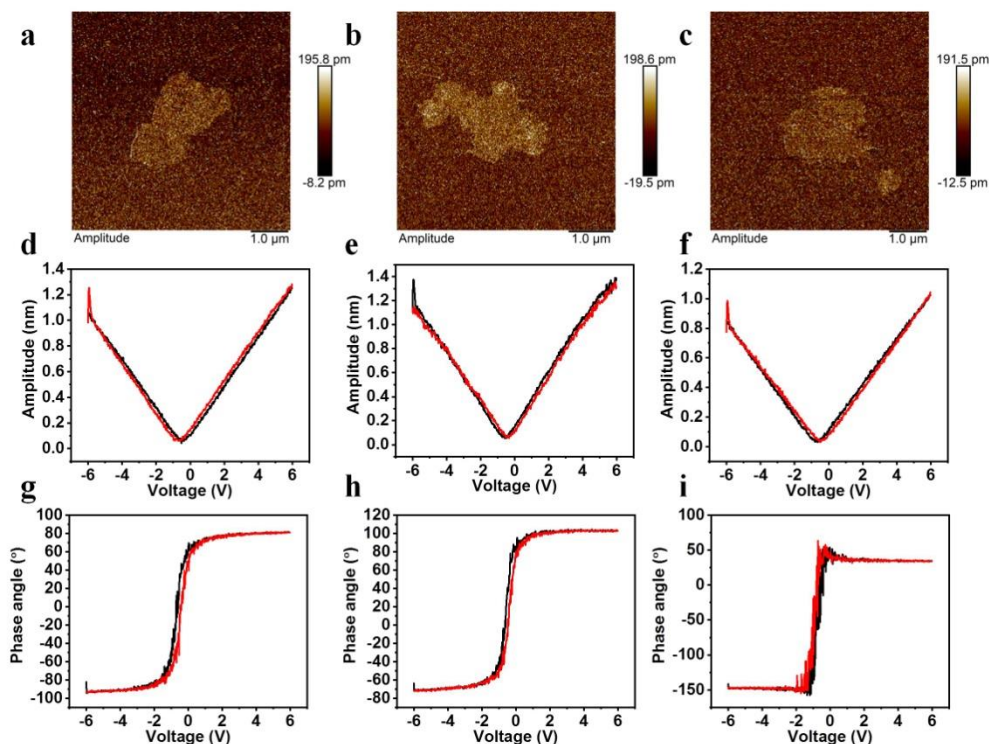

**Fig. S6.** PFM amplitude image, amplitude loop and the phase switching loop of (a, d, g) ZnS, (b, e, h) ZnS-ZnO and (c, f, i) ZnO.

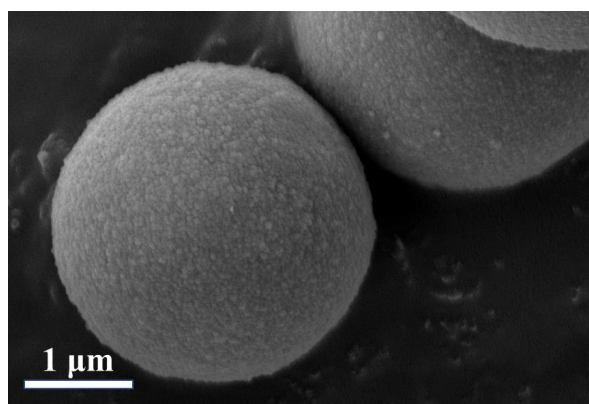

**Fig. S7.** SEM image of ZnS spheres (ZnS-S).

**Note:** The sample is synthesized as follows. 768 mg of  $\text{Zn}(\text{Ac})_2 \cdot 2\text{H}_2\text{O}$ , and 404 mg of  $\text{NH}_2\text{CSNH}_2$  were dissolved in 70 mL of  $\text{H}_2\text{O}$  and 10 mL of  $\text{C}_2\text{H}_8\text{N}_2$ . After stirring vigorously for 30 min, the solution was transferred to a 100 mL Teflon-lined stainless steel autoclave and kept at 160 °C for 10 h. After cooling to room temperature, the precipitate was collected by centrifugation and washed with ultrapure water and anhydrous ethanol (3 times). Finally, it was dried in a vacuum oven at 60 °C overnight.

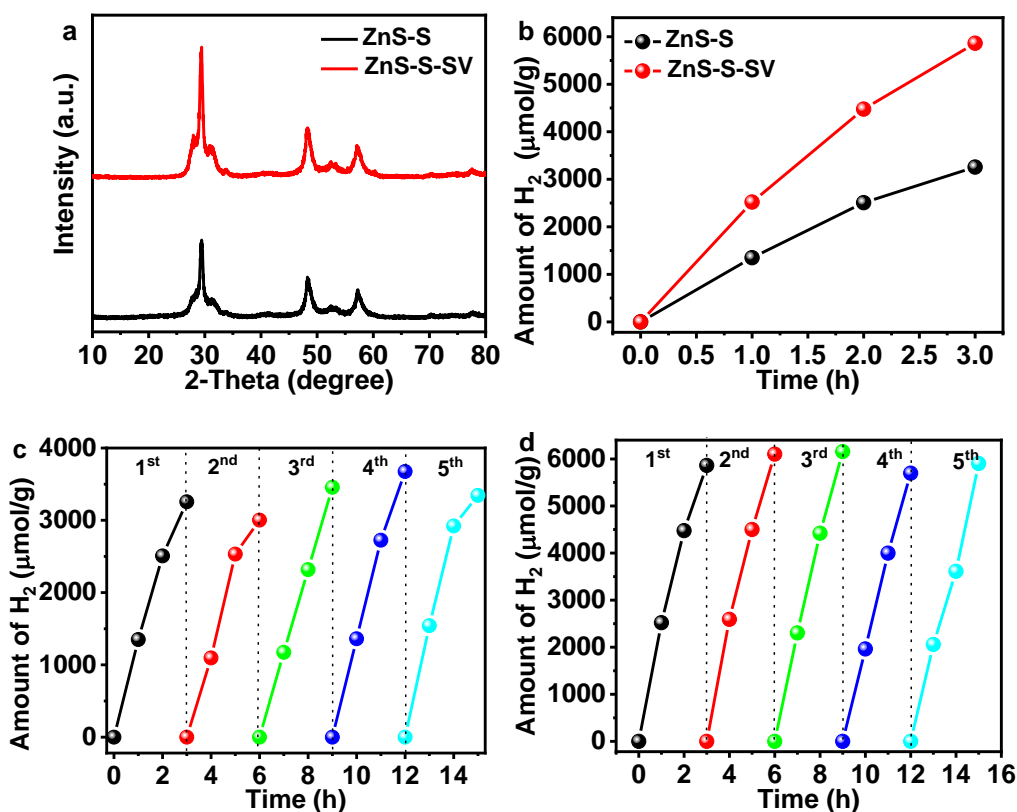

**Fig. S8.** (a) XRD patterns of ZnS spheres (ZnS-S) and ZnS spheres with sulfur vacancy (ZnS-S-SV); (b) piezocatalytic H<sub>2</sub> production over the samples (300 W, 45k Hz); (c) Stability test of the piezocatalytic H<sub>2</sub> production of ZnS-S at 45 kHz and 300 W; (d) Stability test of the piezocatalytic H<sub>2</sub> production of ZnS-S-SV at 45 kHz and 300 W.

**Note:** ZnS spheres with sulfur vacancy (ZnS-S-SV) was synthesized by thermal treatment of ZnS-S at 400 °C for 2 hours under N<sub>2</sub> atmospheres.

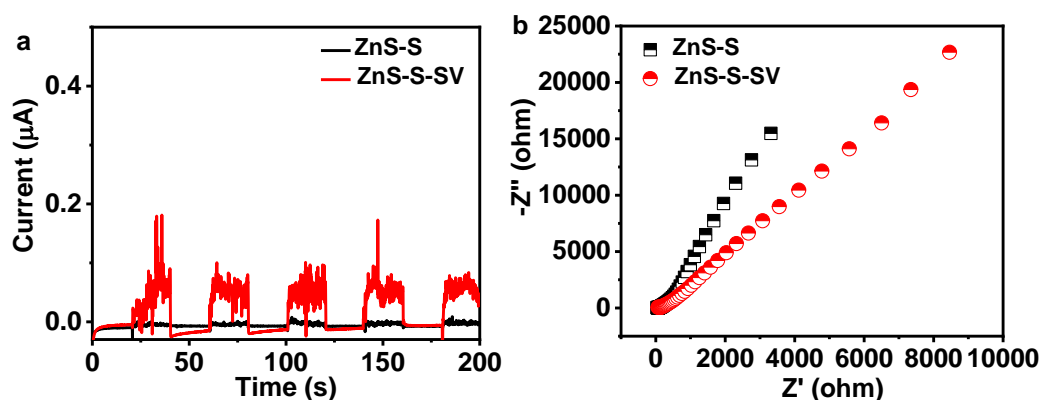

**Fig. S9.** (a) Piezo-current response of ZnS spheres (ZnS-S) and ZnS spheres with sulfur vacancy (ZnS-S-SV); (b) EIS Nyquist plots of the samples.

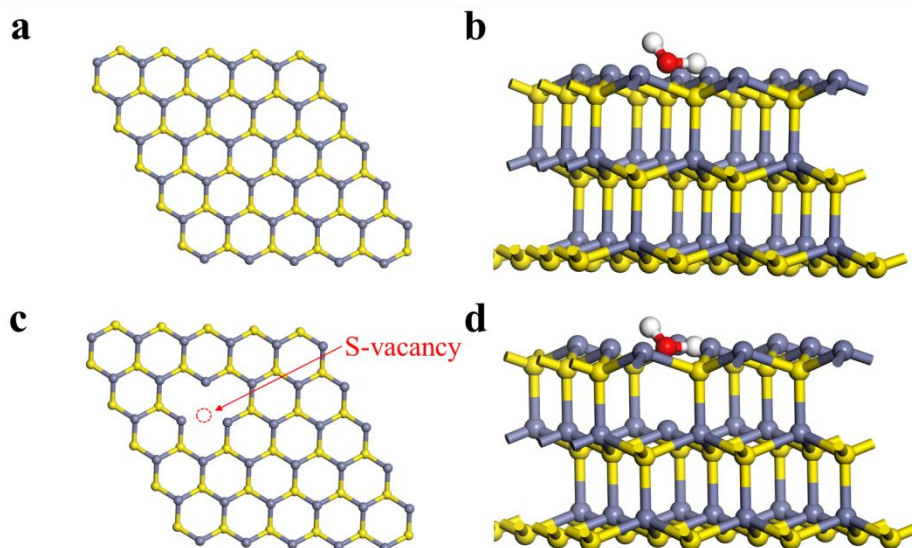

**Fig. S10.** (a) (002) surface of ZnS; (b) H<sub>2</sub>O adsorption on (002) surface of ZnS; (c) (002) surface of ZnS with S vacancy; (d) H<sub>2</sub>O adsorption on (002) surface of ZnS with S vacancy.

**Table S2.** Adsorption energy of H<sub>2</sub>O on (002) surface of ZnS.

|                    | Total Energy before adsorption /Ha | Total energy after adsorption /Ha | Adsorption energy /eV |
|--------------------|------------------------------------|-----------------------------------|-----------------------|
| ZnS                | -58803.46                          | -58879.96                         | -2.14                 |
| ZnS with S vacancy | -58405.18                          | -58481.66                         | -3.05                 |

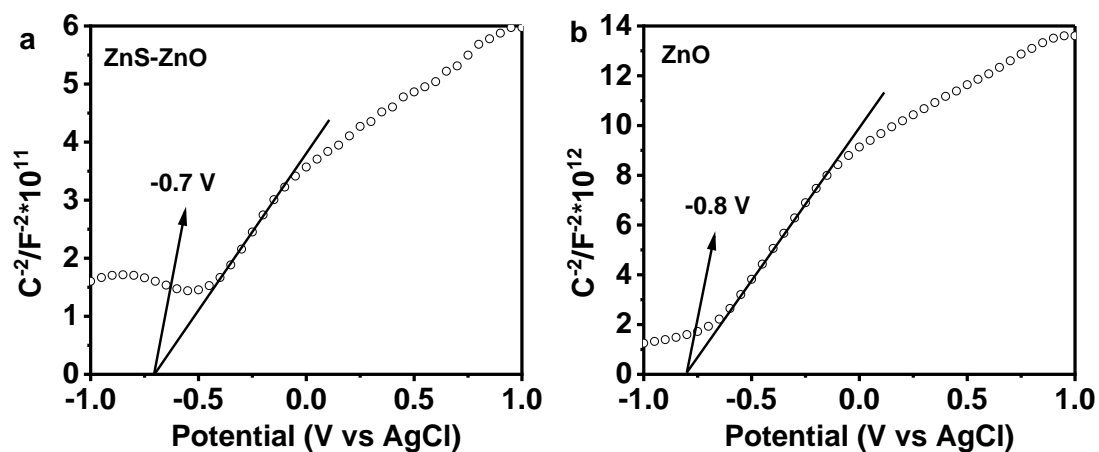

**Fig. S11** Mott-Schottky plot of the ZnS-ZnO (a), ZnO (b).

#### References

1. Pan, X.; Gao, X.; Chen, X.; Lee, H. N.; Liu, Y.; Withers, R. L.; Yi, Z., *ACS Catal.* **2017**, 7 (10), 6991-6998.



- 
2. Hu, P.; Xu, Y.; Lei, Y.; Yuan, J.; Lei, R.; Hu, R.; Chen, J.; Xu, D.; Zhang, S.; Liu, P.; Zhang, X.; Qiu, X.; Feng, W., *J. Energy Chem.* **2022**, *69*, 115-122.
  3. Liu, D.; Sun, X.; Tan, L.; Zhang, J.; Jin, C.-C.; Wang, F., *Ceram. Inter.* **2023**, *49* (12), 20343-20350.
  4. Wang, S.; Tian, W.; Han, J.; Li, N.; Chen, D.; Xu, Q.; Li, H.; Lu, J., *ACS Appl. Mater. Interfaces* **2023**, *15* (47), 55129-55138.
  5. Sun, Y.; Li, X.; Vijayakumar, A.; Liu, H.; Wang, C.; Zhang, S.; Fu, Z.; Lu, Y.; Cheng, Z., *ACS Appl. Mater. Interfaces*, **2021**, *13*, 11050-11057.
  6. Sun, Y.; Li, X.; Vijayakumar, A.; Liu, H.; Wang, C.; Zhang, S.; Fu, Z.; Lu, Y.; Cheng, Z., *ACS Appl. Mater. Interfaces* **2021**, *13* (9), 11050-11057.
  7. Wang, Y.-C.; Wu, J. M., *Adv. Fun. Mater.* **2020**, *30* (5), 1907619.
  8. Jiang, Y.; Xie, J.; Lu, Z.; Hu, J.; Hao, A.; Cao, Y., *J. Colloid and Interface Sci.* **2022**, *612*, 111-120.
  9. Yang, G.; Chen, Q.; Wang, W.; Wu, S.; Gao, B.; Xu, Y.; Chen, Z.; Zhong, S.; Chen, J.; Bai, S., *ACS Appl. Mater. Interfaces* **2021**, *13* (13), 15305-15314.
  10. Yu, C.; Tan, M.; Li, Y.; Liu, C.; Yin, R.; Meng, H.; Su, Y.; Qiao, L.; Bai, Y., *J. Colloid and Interface Sci.* **2021**, *596*, 288-296.
